# Supplementary material for: Dehydration of xylose and glucose to furan derivatives using bifunctional partially hydroxylated MgF2 catalysts and N2-stripping
Source: Royal Society of Chemistry journal article supplement (doi:10.1039/c4cy00129j), 2014-01-01
Supplement: c4cy00129j1.pdf [file c4cy00129j1.pdf]

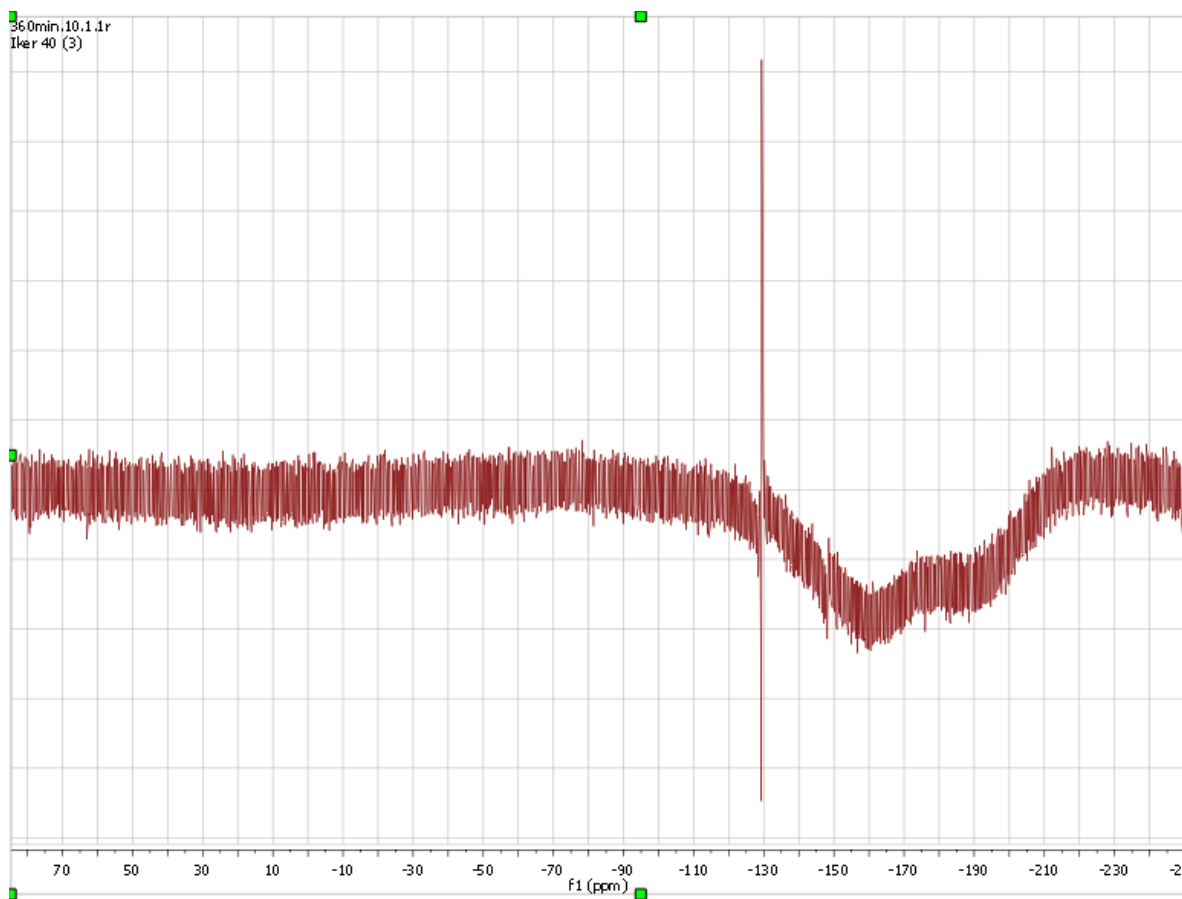

**Figure A1.** The  $^{19}\text{F}$  liquid NMR spectrum of the solution after the xylose dehydration reaction test in water at 160 °C using M-71 as catalyst.

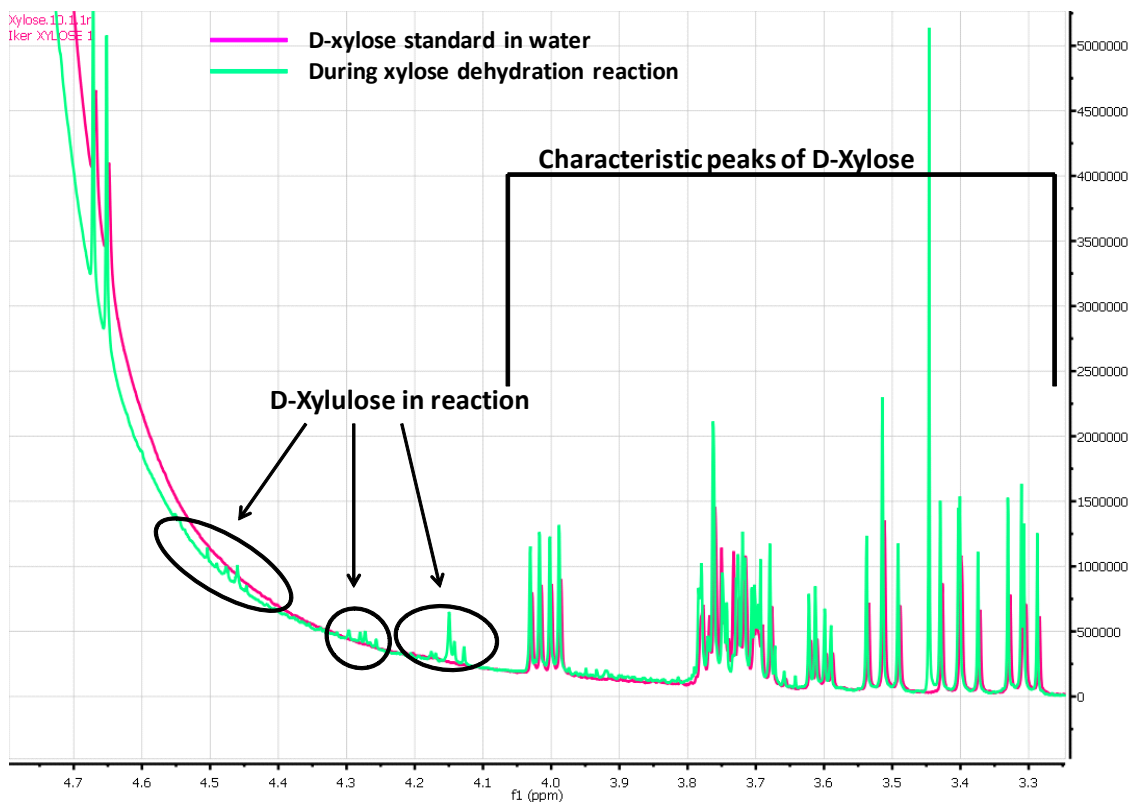

**Figure A2.** The <sup>1</sup>H-NMR spectrum of the solution after the D-xylose dehydration reaction at 8 h in water at 160 °C using M-71 as catalyst. Spectra also compared to reported references [1,2].

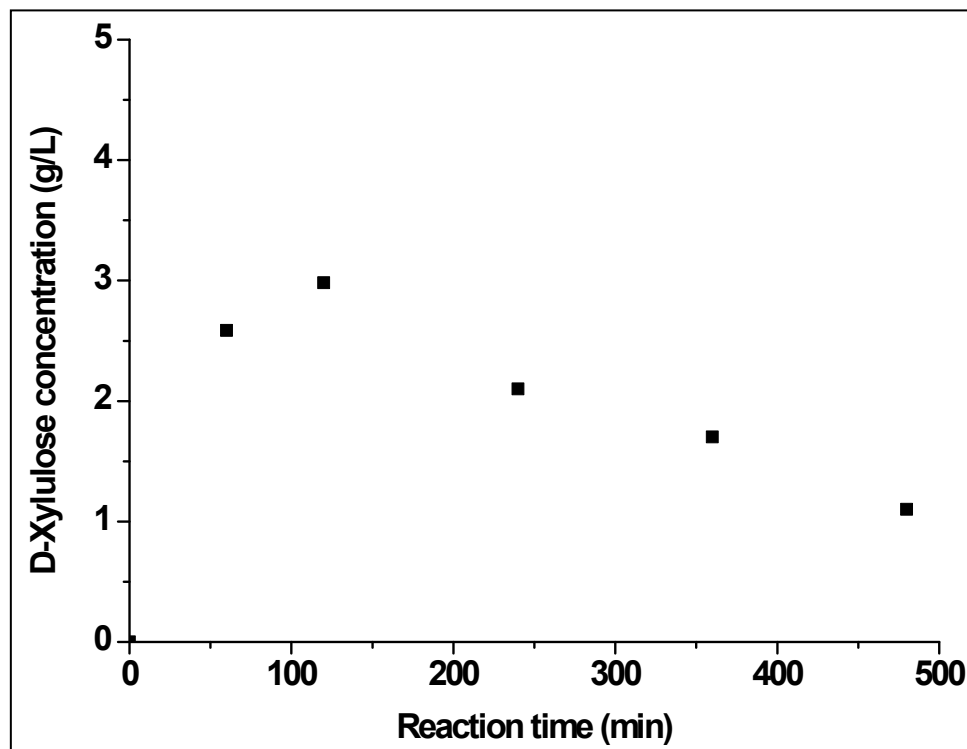

**Figure A3.** Evolution of D-xylulose during the xylose dehydration reaction in water at 160 °C using M-71 as catalyst.

## References

[1] <http://www.hmdb.ca/metabolites/HMDB01644>

[2] <http://www.hmdb.ca/metabolites/hmdb00098>
